# Supplementary material for: Trends in 340B Drug Pricing Program Contract Growth Among Retail Pharmacies From 2009 to 2022
Source: PubMed Central journal article supplement (PMC10403775; doi:10.1001/jamahealthforum.2023.2139), 2023-08-04
Supplement: jamahealthforum-e232139-s001.pdf [file jamahealthforum-e232139-s001.pdf]

## Data Sharing Statement

Nikpay. Trends in 340B Drug Pricing Program Contract Growth Among Retail Pharmacies From 2009 to 2022. *JAMA Health Forum*. Published August 04, 2023.

doi:10.1001/jamahealthforum.2023.2139

### Data

**Data available:** No

### Additional Information

**Explanation for why data not available:** We are not posting the data on a public-facing website at this time but will make it available upon request. As a deliverable to our funder, we are planning to eventually publish our data on a public-facing website.
